# Supplementary material
Source: MDPI journal article supplement (https://www.mdpi.com/search?q=molbank-2023-M1553)
Supplement: s002 [file molbank-2023-M1553-s002-mod.mol]

KingDraw KingDraw.mol
  corina  01172302193D 1   1.00000     0.00000 
CORINA 4.4.0 0026  12.08.2021
 15 16  0  0  0  0  0  0  0  0999 V2000
   -0.0126    1.0758    0.0080 C   0  0  0  0  0  0  0  0  0  0  0  0
    1.1737    1.7806    0.0004 C   0  0  0  0  0  0  0  0  0  0  0  0
   -0.0677    3.8486    0.0234 C   0  0  0  0  0  0  0  0  0  0  0  0
   -1.2474    3.1329    0.0308 C   0  0  0  0  0  0  0  0  0  0  0  0
   -1.2207    1.7498    0.0174 C   0  0  0  0  0  0  0  0  0  0  0  0
   -2.5127    0.9741    0.0188 C   0  0  0  0  0  0  0  0  0  0  0  0
    1.1532    3.1749    0.0081 C   0  0  0  0  0  0  0  0  0  0  0  0
    4.3798    5.4130   -0.5518 S   0  0  0  0  0  0  0  0  0  0  0  0
    2.4235    3.9376    0.0006 C   0  0  0  0  0  0  0  0  0  0  0  0
    4.4186    4.6063    0.9397 N   0  0  0  0  0  0  0  0  0  0  0  0
    2.8124    4.7577   -1.0561 C   0  0  0  0  0  0  0  0  0  0  0  0
    3.3305    3.9056    1.0451 C   0  0  0  0  0  0  0  0  0  0  0  0
    3.0244    2.9463    2.4592 Cl  0  0  0  0  0  0  0  0  0  0  0  0
    2.1054    5.0132   -2.2750 C   0  0  0  0  0  0  0  0  0  0  0  0
    1.5446    5.2159   -3.2419 N   0  0  0  0  0  0  0  0  0  0  0  0
  5  1  1  0
  1  2  2  0
  2  7  1  0
  7  3  2  0
  3  4  1  0
  4  5  2  0
  5  6  1  0
  7  9  1  0
  9 12  1  0
 10  8  1  0
  8 11  1  0
 11  9  2  0
 12 10  2  0
 11 14  1  0
 12 13  1  0
 14 15  3  0
M  END
$$$$
