# Supplementary material
Source: MDPI journal article supplement (https://www.mdpi.com/search?q=molbank-2023-M1553)
Supplement: s002 [file molbank-2023-M1553-s002.inchi]

InChI=1S/C11H7ClN2S/c1-7-2-4-8(5-3-7)10-9(6-13)15-14-11(10)12/h2-5H,1H3
AuxInfo=1/0/N:6,1,4,2,3,14,5,7,11,9,12,13,15,10,8/E:(2,3)(4,5)/rA:15CCCCCCCSCNCCClCN/rB:d1;;s3;s1d4;s5;s2d3;;s7;s8;s8d9;s9d10;s12;s11;t14;/rC:21.3306,-7.6972,0;22.6643,-8.4672,0;21.3306,-10.7772,0;19.9969,-10.0072,0;19.9969,-8.4672,0;18.6628,-7.6976,0;22.6643,-10.0072,0;25.6663,-12.6278,0;23.9981,-10.7766,0;26.4357,-11.2937,0;24.1598,-12.3082,0;25.4049,-10.1498,0;25.7241,-8.6431,0;23.0159,-13.3392,0;21.8719,-14.3702,0;
